# Supplementary material for: Immunodominant antibodies against hemagglutinin in ferrets following infection with 2018 to 2019 influenza vaccine strains
Source: Springer Nature journal article supplement (doi:10.1038/s41541-025-01282-y), 2025-11-21
Supplement: MOESM1 [file 41541_2025_1282_MOESM1_ESM-1.pdf]

1 Supplementary information for  
2  
3 **Immunodominant antibodies against hemagglutinin in ferrets following infection**  
4 **with 2018 to 2019 influenza vaccine strains**

5 Zhu Guo<sup>1,✉</sup>, Thomas Rowe<sup>1</sup>, Jessie Chang<sup>1</sup>, Paul J. Carney<sup>1</sup>, John Steel<sup>1</sup>, and James  
6 Stevens<sup>1,✉</sup>

7 <sup>1</sup>Influenza Division, National Center for Immunization and Respiratory Diseases,  
8 Centers for Disease Control and Prevention, 1600 Clifton Road, Atlanta, GA 30329,  
9 USA. ✉Corresponding authors E-mail: [bkj2@cdc.gov](mailto:bkj2@cdc.gov); [fwb4@cdc.gov](mailto:fwb4@cdc.gov).

10

11 This PDF file includes:

12 Supplementary Figures 1 to 5

13

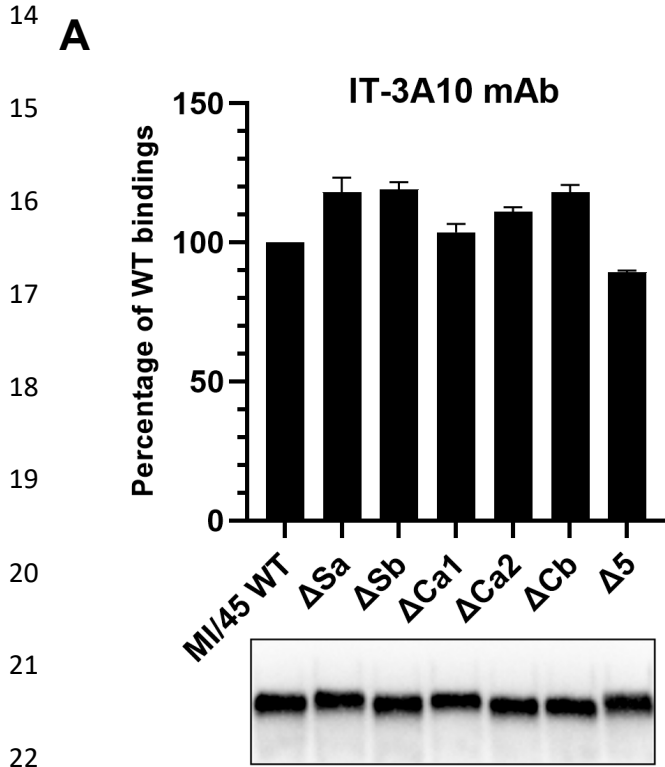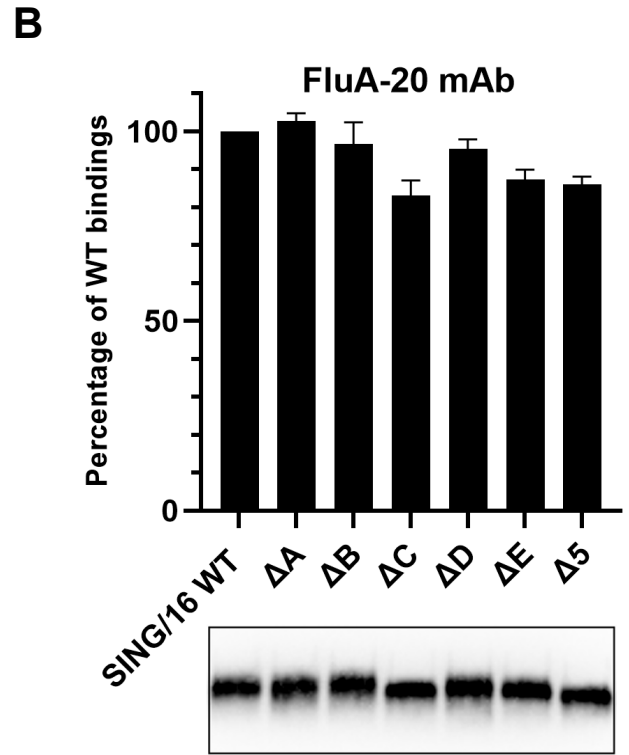

23 **Supplementary Figure 1. Characterization of antigenic site mutants of MI/45 and**  
 24 **SING/16 HA1.** The proper folding of antigenic site mutants of MI/45 and SING/16 rHA1  
 25 was assessed using the f-AbBA-2 with the anti-MI/45 HA1 mAb, IT-3A10 (**A**) and the pan-  
 26 H3 anti-HA1 mAb, FluA-20 (**B**), respectively. Binding results for each rHA1 mutant were  
 27 normalized against corresponding WT controls. Each bar represents the median and  
 28 standard deviation from three independent experiments. Equivalent amounts of rHA1s  
 29 used in the assay were confirmed by Western blot.

30  
 31  
 32  
 33

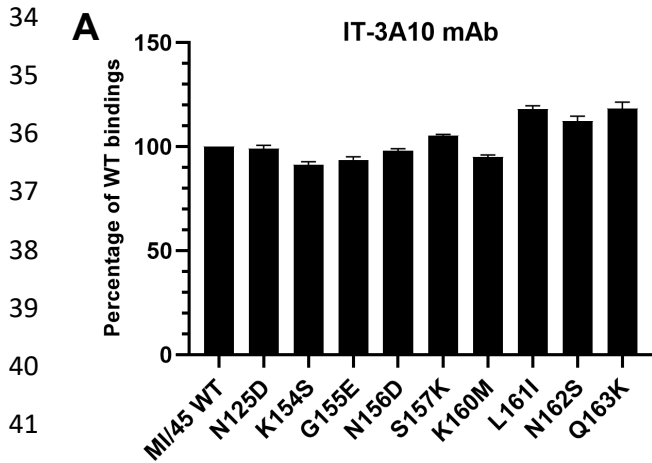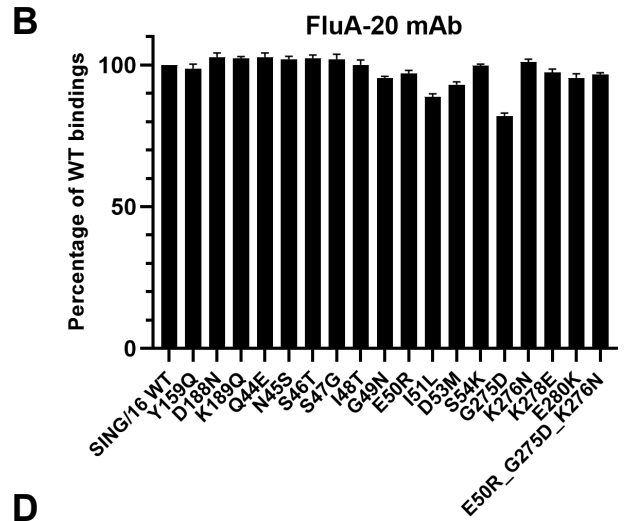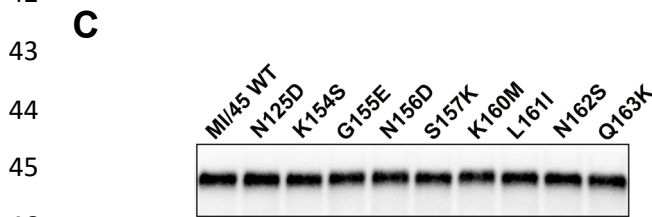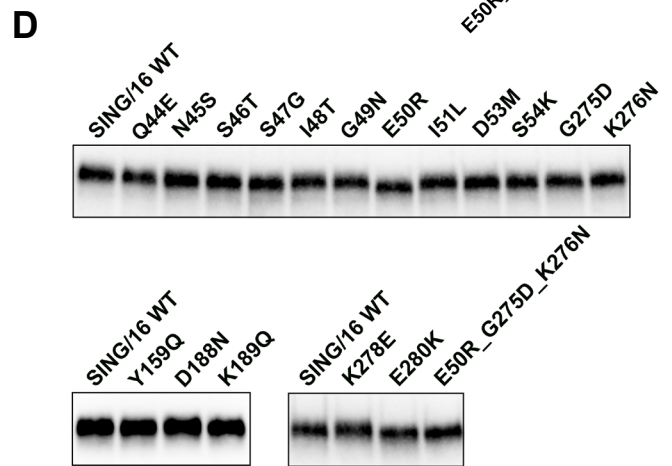

**Supplementary Figure 2. Characterization of rHA1 mutants carrying single or multiple substitutions within dominant antigenic sites of MI/45 and SING/16.** The proper folding of MI/45 and SING/16 rHA1 mutants was assessed using the f-AbBA-2 with the anti-MI/45 HA1 mAb, IT-3A10 (**A**) and the pan-H3 anti-HA1 mAb, FluA-20 (**B**), respectively. Binding results for each rHA1 mutant were normalized against corresponding WT controls, with each bar representing the median and standard deviation from three independent experiments. Equivalent amounts of rHA1s used in the assay were confirmed by Western blot (**C & D**).

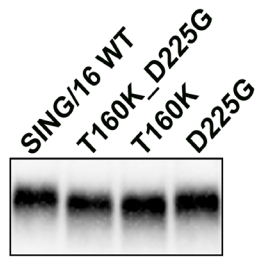

66

67 **Supplementary Figure 3. Characterization of SING/16 rHA1 mutants carrying single**  
68 **or multiple egg-adaptive substitutions.** Equivalent amounts of rHA1s used in the assay  
69 were confirmed by Western blot.

70

71

72

73

74

A

75

76

77

78

79

80

81

82

|         |             |            |            |            |            |            |            |            |     |
|---------|-------------|------------|------------|------------|------------|------------|------------|------------|-----|
|         |             | 50         | 60         | 70         | 80         | 90         | 100        | 110        | 120 |
| SING/16 | ELVQNSSIGE  | ICDSPHQILD | GENCTLIDAL | LGDPQCDGFQ | NKKWDLFVER | SKAYSNCYPY | DVPDYASLRS | LVASSGTLEF |     |
| KS/14   | ELVQNSSIGE  | ICDSPHQILD | GENCTLIDAL | LGDPQCDGFQ | NKKWDLFVER | NKAYSNCYPY | DVPDYASLRS | LVASSGTLEF |     |
|         |             | 130        | 140        | 150        | 160        | 170        | 180        | 190        | 200 |
| SING/16 | KNESFNWITGV | TQNGTSSACI | RGSSSSFFSR | LNWLTHLNYT | YPALNVTMPN | KEQFDKLYIW | GVHHPGTDKD | QIFLYAQSSG |     |
| KS/14   | KNESFNWAGV  | TQNGTSSSCI | RGSSSSFFSR | LNWLTHLNSK | YPALNVTMPN | NEQFDKLYIW | GVHHPGTDKD | QISLYAQSSG |     |
|         |             | 210        | 220        | 230        | 240        | 250        | 260        | 270        | 280 |
| SING/16 | RITVSTKRSQ  | QAVIPNIGSR | PRIRDIPSRI | SIYWTIVKPG | DILLINSTGN | LIAPRGYFKI | RSKSSSIMRS | DAPIGKCKSE |     |
| KS/14   | RITVSTKRSQ  | QAVIPNIGSR | PRIRDIPSRI | SIYWTIVKPG | DILLINSTGN | LIAPRGYFKI | RSKSSSIMRS | DAPIGKCKSE |     |
|         |             | 290        | 300        |            |            |            |            |            |     |
| SING/16 | CITPNGSIPN  | DKPFQNVNRI | TYGACPRY   |            |            |            |            |            |     |
| KS/14   | CITPNGSIPN  | DKPFQNVNRI | TYGACPRY   |            |            |            |            |            |     |

83

B

84

85

86

87

88

89

90

91

92

93

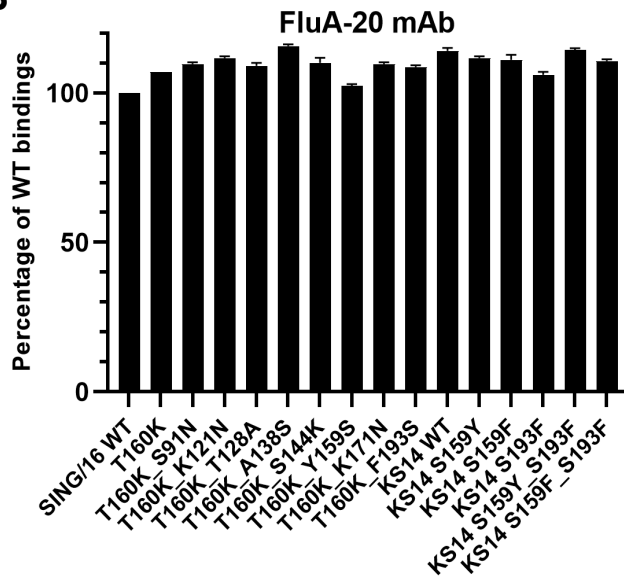

C

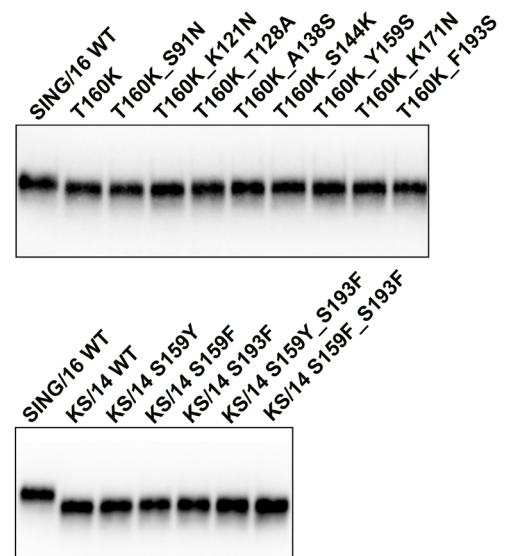

94 **Supplementary Figure 4. Characterization of SING/16 and KS/14 rHA1 mutants used**  
 95 **in SING/16 HA1 epitope mapping.** (A) Amino acid sequences of SING/16 and KS/14  
 96 HA1 were aligned with substitutions highlighted. (B) The proper folding of expressed rHA1  
 97 mutants from SING/16 and KS/14 was assessed using the f-AbBA-2 with the pan-H3 anti-  
 98 HA1 mAb, FluA-20. Binding results for each rHA1 mutant were normalized against  
 99 SING/16 WT controls, with each bar representing the median and standard deviation from  
 100 three independent experiments. (C) Equivalent amounts of rHA1s used in the assay were  
 101 confirmed by Western blot.

102

103

104

105

106  
107  
108  
109  
110  
111  
112  
113  
114  
115  
116  
117  
118  
119  
120  
121  
122  
123  
124  
125  
126  
127  
128  
129  
130  
131  
132  
133  
134  
135  
136  
137

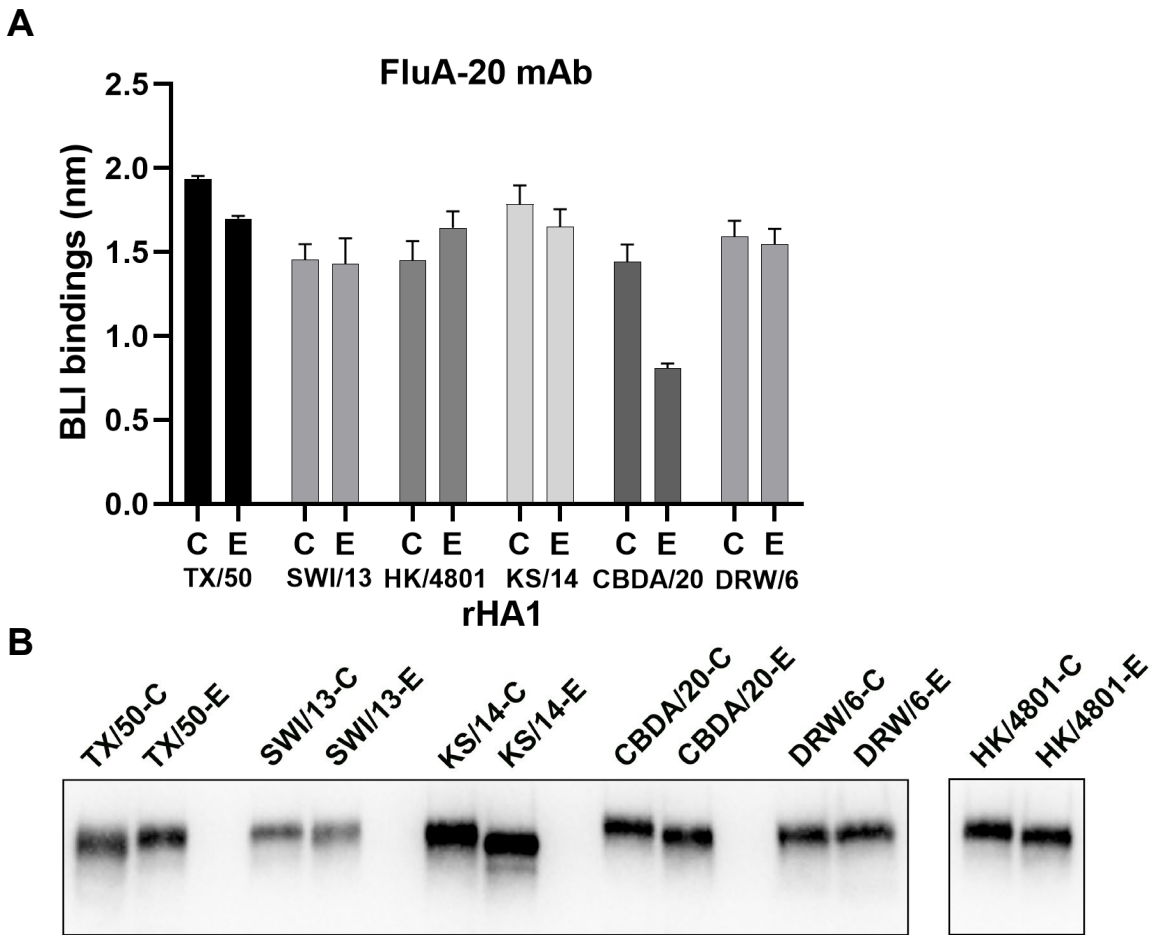

**Supplementary Figure 5. Characterization of rHA1s of A(H3N2) vaccine viruses from recent flu seasons. (A)** The proper folding of expressed rHA1s from cell-grown or egg-grown A(H3N2) vaccine viruses was assessed using the f-AbBA-2 with the pan-H3 anti-HA1 mAb, FluA-20. Each bar represents the median BLI binding with standard deviation from three independent experiments. “C” denotes cell-version rHA1 from cell-grown virus, while E denotes egg-version rHA1 from egg-grown virus. **(B)** Equivalent amounts of each rHA1 pair used in the assay were confirmed by Western blot.
